# Supplementary material
Source: MDPI journal article supplement (https://www.mdpi.com/2073-4344/12/11/1469)
Supplement: s1 [file s1 › catalysts-2026776-supplementary.pdf]

*Supporting Information for*

# **Application of Dithiocarbamate Chitosan Modified SBA-15 for Catalytic Reductive Removal of Vanadium(V)**

**Yilin Huang <sup>1</sup>, Jia Wang <sup>2,3,\*</sup>, Mengwei Li <sup>1</sup> and Zhixiong You <sup>1,\*</sup>**

<sup>1</sup> School of Resource and Environmental Sciences, Wuhan University, Wuhan 430072, China

<sup>2</sup> School of Environmental Science and Engineering, Huazhong University of Science and Technology, Wuhan 430074, China

<sup>3</sup> Key Laboratory of Material Chemistry and Service Failure, School of Chemistry and Chemical Engineering, Huazhong University of Science and Technology, Wuhan 430074, China

\* Correspondence: [jiawang@hust.edu.cn](mailto:jiawang@hust.edu.cn) (J.W.); [zyou@whu.edu.cn](mailto:zyou@whu.edu.cn) (Z.Y.); Tel: +027-87734899 (Z.Y.)

**Text S1** Details of synthesis procedures of SBA-15

SBA-15 was synthesized by the following method. Typically, 14.98 g Poly(ethylene glycol)-block-poly(propylene glycol)-block-poly(ethylene glycol) (Pluronic P123) was dissolved in HCl solution ( $\text{HCl}:\text{H}_2\text{O}=8.00\text{g}:266.50\text{g}$ ) in a polypropylene bottle. After stirring the mixture at 311 K overnight, 28.95 g tetraethyl orthosilicate (TEOS) was added to the mixture and stirred for 24 h at 311 K. And then, the sample was kept for 24 h at 363 K. Finally, the solids were separated, dried at 363 K overnight and calcined at 823 K for 5 h.

**Text S2** Details of synthesis procedures of CS<sub>2</sub>-chitosan

0.05 mol NH<sub>3</sub>·H<sub>2</sub>O and 8.00 g chitosan were mixed in (95.0 % v/v) ethanol for 1.5 h at 333 K, and then added 4.00 ml CS<sub>2</sub> into the mixture further stirred for 2 h. Finally, the mixture was filtered, washed several times with ethanol and dried at 333K overnight.

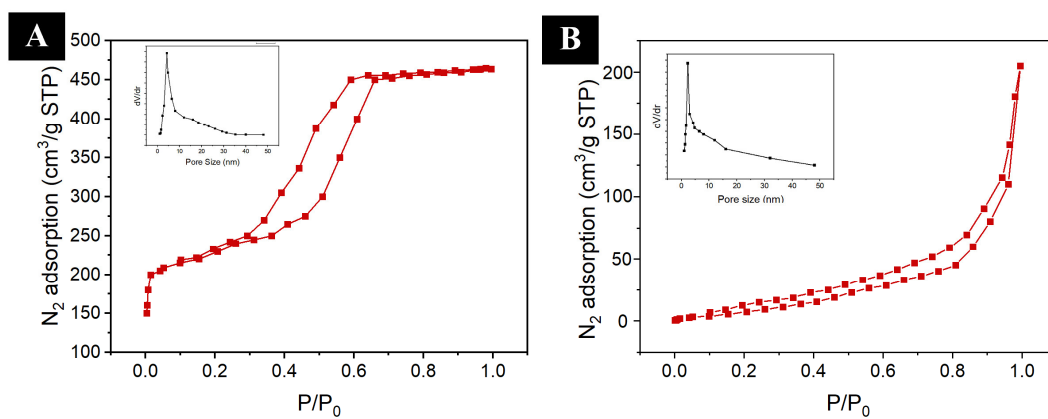

**Figure S1** Nitrogen sorption isotherms of SBA-15 (A) and  $\text{CS}_2\text{C@SBA-1}$  (B).

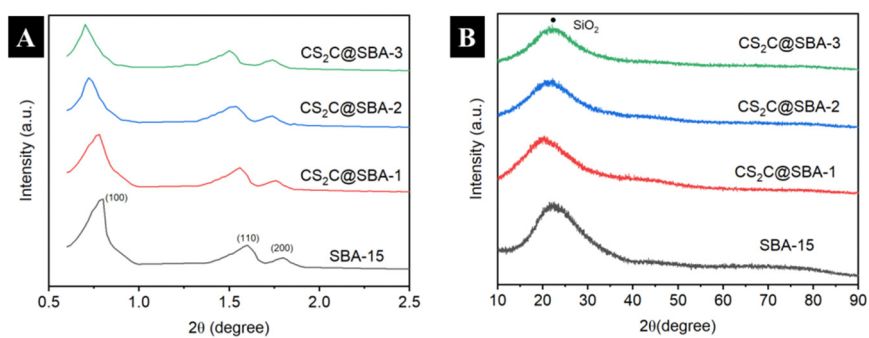

**Figure S2** The XRD pattern of preparation composite

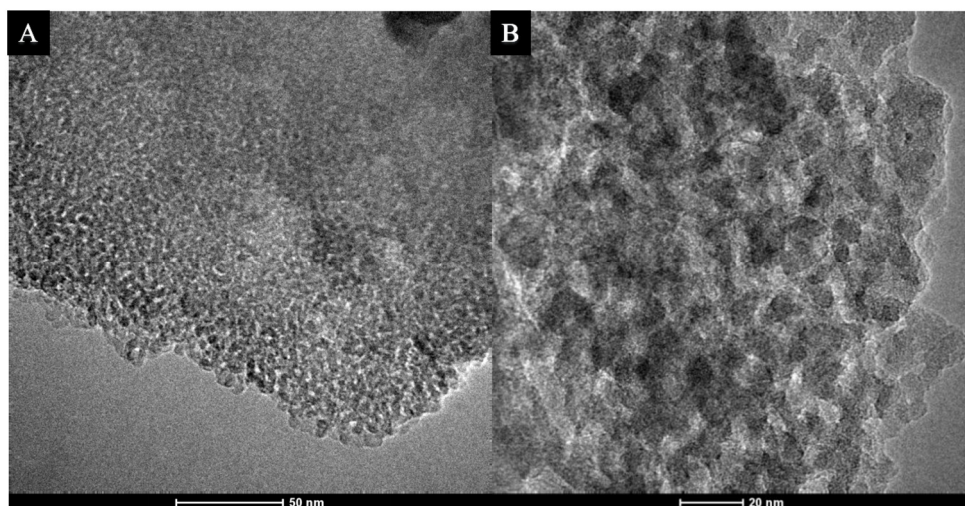

**Figure S3** TEM images of SBA-15 (**A**) and CS<sub>2</sub>C@SBA-3 (**B**).

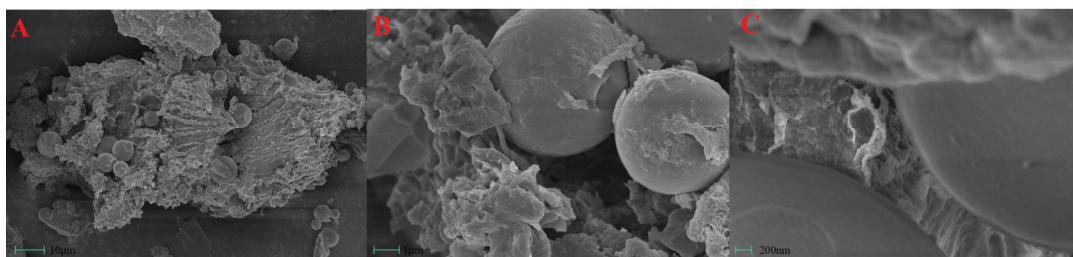

**Figure S4** SEM images of CS<sub>2</sub>C@SBA-3 after reaction with V(V) (A - C). Conditions: Conditions: V(V) initial concentration = 100 ppm, CS<sub>2</sub>C@SBA-3 dosage = 1.0 g/L, pH value = 3.0, experimental temperature = 298 K, contact time = 24 h.

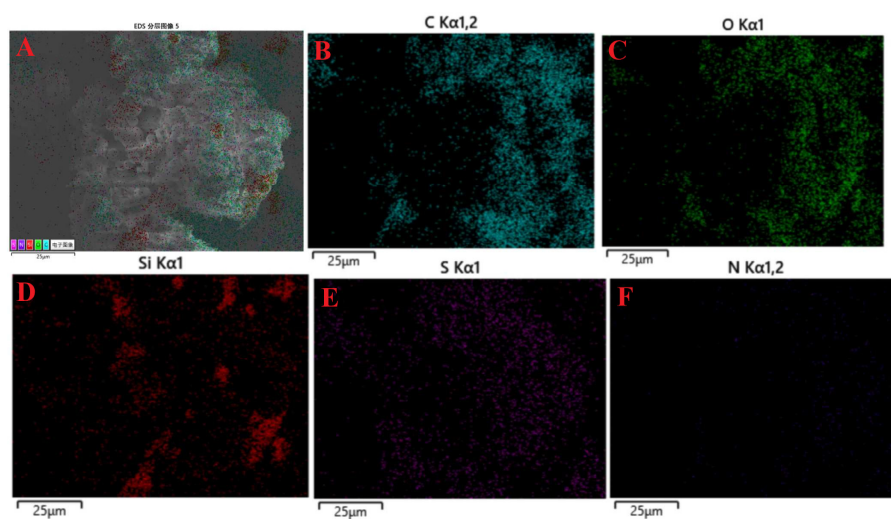

**Figure S5** EDS elemental mapping images of  $\text{CS}_2\text{C@SBA-3}$  before reaction with  $\text{V(V)}$  (A - F)

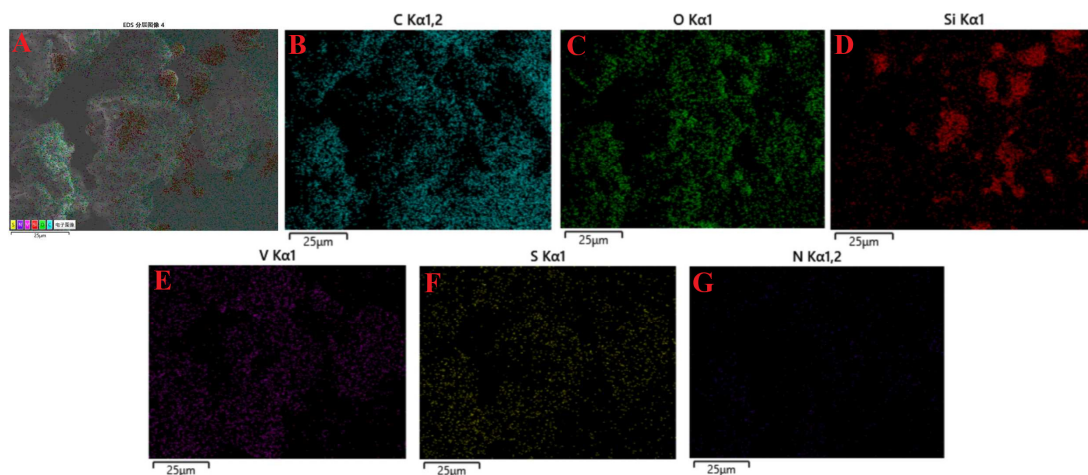

**Figure S6** EDS elemental mapping images of CS<sub>2</sub>C@SBA-3 after reaction with V(V). Conditions: Conditions: V(V) initial concentration = 100 ppm, CS<sub>2</sub>C@SBA-3 dosage = 1.0 g/L, pH value = 3.0, experimental temperature = 298 K, contact time = 24 h.

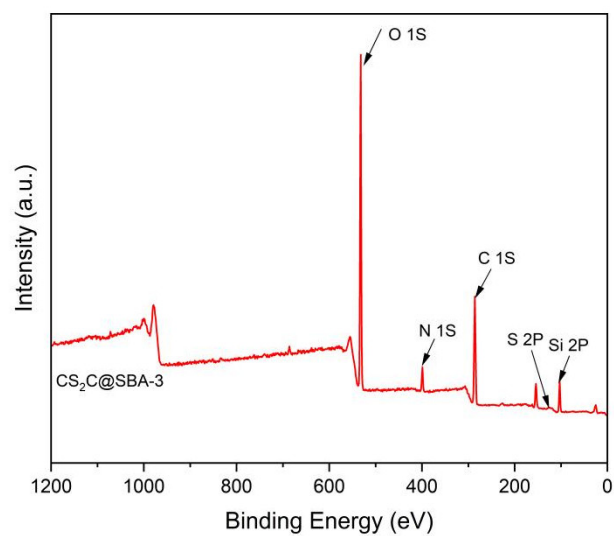

**Figure S7** The XPS survey spectra of  $\text{CS}_2\text{C@SBA-3}$  before reaction.

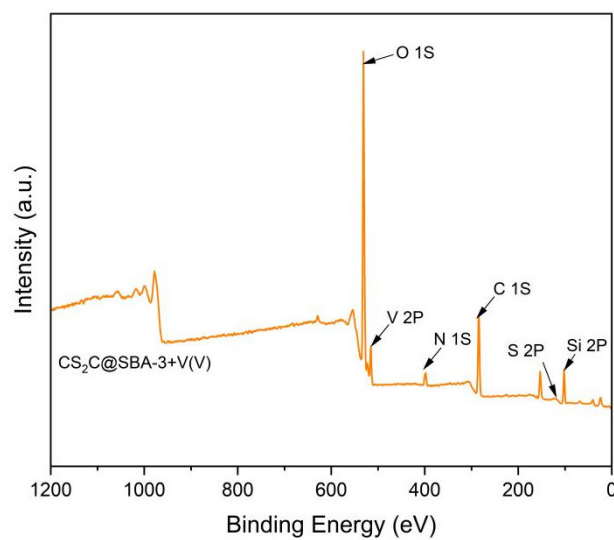

**Figure S8** The XPS survey spectra of  $\text{CS}_2\text{C@SBA-3}$  after reaction. Conditions: Conditions: V(V) initial concentration = 100 ppm,  $\text{CS}_2\text{C@SBA-3}$  dosage = 1.0 g/L, pH value = 3.0, experimental temperature = 298 K, contact time = 24 h.

**Table S1** Porous properties of SBA-15 and CS<sub>2</sub>C@SBA-3.

| Adsorbent              | N <sub>2</sub> Adsorption                           |                                                 |                 |
|------------------------|-----------------------------------------------------|-------------------------------------------------|-----------------|
|                        | S <sub>BET</sub> (m <sup>2</sup> ·g <sup>-1</sup> ) | Pore volume (cm <sup>3</sup> ·g <sup>-1</sup> ) | Pore width (nm) |
| SBA-15                 | 632.6                                               | 0.5743                                          | 4.2856          |
| CS <sub>2</sub> CSBA-1 | 121.4                                               | 0.1631                                          | 2.0357          |
| CS <sub>2</sub> CSBA-2 | 223.4                                               | 0.1698                                          | 2.1765          |
| CS <sub>2</sub> CSBA-3 | 309.2                                               | 0.1762                                          | 2.2796          |

**Table S2** Physico-chemical properties of water samples used in this study

| Parameter                            | Lake | Pond | Tap   |
|--------------------------------------|------|------|-------|
| pH                                   | 7.93 | 8.04 | 7.34  |
| COD(mg/L)                            | 12.3 | 13.4 | 1.02  |
| Electrical conductivity (mS/cm)      | 0.38 | 0.21 | 0.077 |
| Ca <sup>2+</sup> (mg/L)              | 16.8 | 15.4 | 9.6   |
| SO <sub>4</sub> <sup>2-</sup> (mg/L) | 9.2  | 8.14 | 3.9   |
| NO <sub>3</sub> <sup>2-</sup> (mg/L) | 32.2 | 31.6 | 15.4  |
| Cl <sup>-</sup> (mg/L)               | 22.5 | 20.4 | 7.1   |
| PO <sub>4</sub> <sup>3-</sup> (mg/L) | 25.7 | 27.8 | 12.9  |
